# Supplementary material for: Factors Associated with Severe Human Rift Valley Fever in Sangailu, Garissa County, Kenya
Source: PubMed Central journal article supplement (PMC4357470; doi:10.1371/journal.pntd.0003548), 2015-03-12
Supplement: pntd.0003548.s002.pdf [file pntd.0003548.s002.pdf]

# MRCE-CWRU-DVBND RVF surveys: Part 1, PERSONAL DETAILS

ID  Date of Registration   
(dd/mm/yyyy)

|                      |                      |
|----------------------|----------------------|
| Subject's First Name | <input type="text"/> |
| Second Name          | <input type="text"/> |
| Third Name           | <input type="text"/> |
| Other name           | <input type="text"/> |

House Number   
Village   
Head of Household's Name   
Relationship to HH   
Usual Occupation

Did you SLEEP in this house LAST NIGHT?  Yes  No

Year of Birth   
Sex (F=Female, M=Male)

How many YEARS living here?:  Stay how many MONTHS next year?

|                                                                                                       |                                                                                                       |
|-------------------------------------------------------------------------------------------------------|-------------------------------------------------------------------------------------------------------|
| Father's name: <input type="text"/>                                                                   | Mother's name: <input type="text"/>                                                                   |
| Is father living? <input type="radio"/> Yes <input type="radio"/> No <input type="radio"/> Don't Know | Is mother living? <input type="radio"/> Yes <input type="radio"/> No <input type="radio"/> Don't Know |
| Where does he live? <input type="text"/>                                                              | Where does she live? <input type="text"/>                                                             |
| F's father: <input type="text"/>                                                                      | M's father: <input type="text"/>                                                                      |
| F's mother: <input type="text"/>                                                                      | M's mother: <input type="text"/>                                                                      |

Demography team to check village records and complete boxes below:

|                                      |                                      |
|--------------------------------------|--------------------------------------|
| F study number: <input type="text"/> | M study number: <input type="text"/> |
| F house number: <input type="text"/> | M house number: <input type="text"/> |

Name of Data Collector   
Name of Data Enterer

MRCE-CWRU-DVBND RVF surveys: Part 2, NON-ANIMAL EXPOSURES

ID  IF NOT HOUSEHOLD INFORMANT, skip this page, go to Part 3

Has your home been flooded in past 4 yrs?

Yes  No

If yes, when was it flooded? (year)

Have you ever been displaced by floods?

Yes  No

If yes, when were you displaced? (year)

Do you get mosquito bites frequently?

Yes  No

Do you avoid mosquito bites?

Yes  No

IF NO, skip to Part B, below

---

Do you sleep under a mosquito net?

Yes  No

Do you use mosquito coil?

Yes  No

If yes, how often do you use coils?

Indicate: Never, Other, Monthly, Weekly, or Daily

Do you use other mosquito control?

Yes  No

If yes, what kind?

Do you have screens on your home windows?

Yes  No

---

Part B:

Do you get mosquito bites during the daytime?

Yes  No

Do you get mosquito bites during the nighttime?

Yes  No

When was the last time you felt unwell?

Indicate: < 1month, 1-3 mo, 4-6mo, 7-12mo, 1-2 yr, or never

---

Have you had a death in the family in last 4 yrs?

Yes  No

If yes, how many?:

If yes, when?:

Notes:

What is your source of drinking water? Mark all that apply.

River

Yes  No

Inside water container

Yes  No

Pond or Pool

Yes  No

Kiosk or Tanker

Yes  No

Rain or cistern

Yes  No

Water tap/piped

Yes  No

Public well/borehole

Yes  No

Other

Yes  No

Interviewer: note type of roofing.

Indicate: natural material, corrugated metal or plastic, or other

Interviewer: note type of latrine.

Indicate: bush, pit, VIP latrine, toilet, other

Interviewer: note type of flooring.

Indicate: dirt, wood, cement, tile, or other

List objects around home that collect water [tires, pots, plants, etc.]

Principal Investigators: LaBeaud, Kazura, King, Muchiri

MRCE-CWRU-DVBND RVF surveys: Part 3, ANIMAL EXPOSURES

ID

How often do you have sheep contact?:

Indicate: Never, Other, Monthly, Weekly, or Daily

How often do you have goat contact?:

Indicate: Never, Other, Monthly, Weekly, or Daily

How often do you have cow contact?:

Indicate: Never, Other, Monthly, Weekly, or Daily

How often do you have camel contact?:

Indicate: Never, Other, Monthly, Weekly, or Daily

Have you SHELTERED livestock in your home?  Yes  No

camel  sheep  goat  cow  other

Do you SLAUGHTER livestock?  Yes  No

If yes, when was the last time?

camel  sheep  goat  cow  other

Do you SKIN or BUTCHER livestock?  Yes  No

If yes, when was the last time?

camel  sheep  goat  cow  other

Do you eat RAW MEAT?  Yes  No

Do you HANDLE RAW MEAT in cooking?  Yes  No

camel  sheep  goat  cow  other

Have you ever MILKED an animal?  Yes  No

camel  sheep  goat  cow  other

Have you ever DRUNK RAW MILK?  Yes  No

camel  sheep  goat  cow  other

Do you ASSIST DURING the birth of livestock?  Yes  No

camel  sheep  goat  cow  other

Have you DISPOSED OF AN ABORTED ANIMAL FETUS?  Yes  No

camel  sheep  goat  cow  other

MRCE-CWRU-DVBND RVF surveys: Part 4, PATIENT SYMPTOMS

ID

Are you sick now?

Yes  No

How long have you been sick?:

Have you had any of these symptoms in the LAST 30 DAYS?

Fever

Yes  No

No appetite

Yes  No

Backache

Yes  No

Vomiting

Yes  No

Nausea

Yes  No

Malaise

Yes  No

Have you EVER had any of these symptoms?

Vomiting Blood

Yes  No

Severe bruising  
for no reason

Yes  No

Red eyes

Yes  No

Gum bleeding

Yes  No

Poor vision

Yes  No

Painful eyes to light

Yes  No

Eye pain

Yes  No

Spinning feeling

because of an illness

Yes  No

Mental Confusion

because of an illness

Yes  No

Much too sleepy

because of an illness

Yes  No

Severe neck stiffness

Yes  No

Coma

Yes  No

Seizures or Fits

Yes  No

Principal Investigators: LaBeaud, Kazura, King, Muchiri

MRCE-CWRU-DVBND RVF surveys: Part 5, PHYSICAL EXAM

ID  Weight in kg  Height in cm

Wasted?  Yes  No

Scleral Hemorrhages?  Yes  No

Scleral Icterus?  Yes  No

Jaundice?  Yes  No

Petechiae?  Yes  No

Liver Enlarged?  Yes  No

Spleen Enlarged?  Yes  No

Lymphadenopathy

Comments

Name of Medical Doctor

Name of Data Enterer

MRCE-CWRU-DVBND RVF surveys: Part 6, OPHTHALMOLOGIC EXAM

ID

Visual Acuity-L

Visual Acuity-R

Anterior Chamber-L

Anterior Chamber-R

Anterior Uveitis-L?  Yes  No

Anterior Uveitis-R?  Yes  No

Posterior Chamber-L

Posterior Chamber-R

Vitreous reaction-L?  Yes  No

Vitreous reaction-R?  Yes  No

Retina-L

Retina-R

Retinitis-L?  Yes  No

Retinitis-R?  Yes  No

Macular-L?  Yes  No

Macular-R?  Yes  No

Paramacular-L?  Yes  No

Paramacular-R?  Yes  No

Retinal Hemorrhage-L?  Yes  No

Retinal Hemorrhage-R?  Yes  No

Zone-L

Zone-R

Area-L

Area-R

Optic disc edema-L?  Yes  No

Retinal vasculitis-L?  Yes  No

Optic disc edema-R?  Yes  No

Retinal vasculitis-R?  Yes  No

Comments:  
(Is this RVF-related or Other?)

Ophthalmologist Name

Data Enterer Name
